# Supplementary material for: Regulating the particle sizes of NaA molecular sieves toward enhanced heavy metal ion adsorption
Source: Royal Society of Chemistry journal article supplement (doi:10.1039/d3nj05924c), 2024-01-01
Supplement: d3nj05924c1.pdf [file d3nj05924c1.pdf]

## Supporting Information

### Regulating the particle sizes of NaA molecular sieves toward enhanced heavy metal adsorption

WenLi Cui<sup>a,#</sup>, Ke Tang<sup>a,#</sup>, Yunqiang Chen<sup>b</sup>, Zhou Chen<sup>a</sup>, Yihong Lan<sup>b</sup>, YuBin Hong<sup>b,\*</sup>,

WeiGuang Lan<sup>a,b,\*</sup>

[a] Ms. W.L. Cui, Mr. K. Tang, Dr. Z. Chen, Prof. W.G. Lan

Xiamen University Center for Membrane Application and Advancement, College of Materials, Xiamen University, Xiamen 361005, Fujian, China.

[b] Dr. Y.H. Lan, Mr. Y.Q. Chen, Mr. Y.B. Hong, Prof. W.G. Lan

Suntar Membrane Technology (Xiamen) Co., Ltd., Xiamen 361022, Fujian, China.

# These authors contributed equally to this work.

**Corresponding authors:** Mr. Y.B. Hong (hongyb@suntar.com); Prof. W.G. Lan (wglan@xmu.edu.cn)

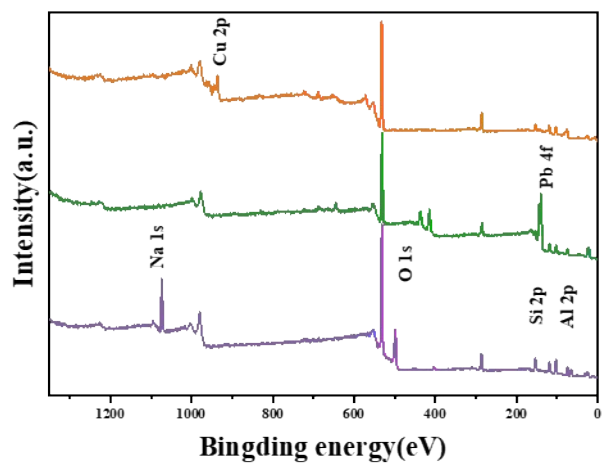

**Fig. S1** XPS full spectrum of NaA molecular sieve before and after adsorption.

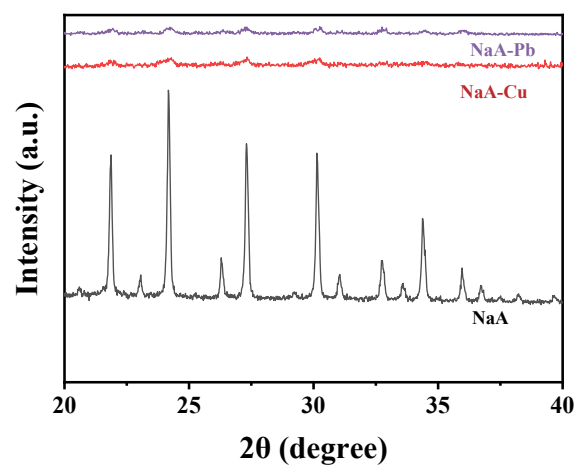

**Fig. S2** XRD patterns before and after adsorption of heavy metals ions..

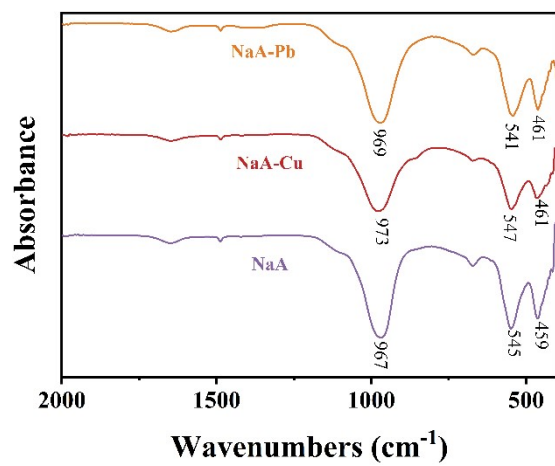

**Fig. S3** FTIR spectra before and after adsorption of heavy metals ions

**Table S1.** NaA molecular sieve synthesis conditions

| <b>Number</b> | <b>Na<sub>2</sub>O/Al<sub>2</sub>O<sub>3</sub></b> | <b>(TMA)<sub>2</sub>O/Al<sub>2</sub>O<sub>3</sub></b> | <b>Synthesis<br/>time (h)</b> | <b>Synthesis<br/>temperature<br/>(°C)</b> | <b>Ageing<br/>time<br/>(d)</b> |
|---------------|----------------------------------------------------|-------------------------------------------------------|-------------------------------|-------------------------------------------|--------------------------------|
| A1            | 0.15                                               | 6                                                     | 24                            | 80                                        | 1                              |
| A2            | 0.3                                                | 6                                                     | 24                            | 80                                        | 1                              |
| A3            | 0.45                                               | 6                                                     | 24                            | 80                                        | 1                              |
| A4            | 0.6                                                | 6                                                     | 24                            | 80                                        | 1                              |
| A5            | 0.75                                               | 6                                                     | 24                            | 80                                        | 1                              |
| A6            | 0.3                                                | 4                                                     | 24                            | 80                                        | 1                              |
| A7            | 0.3                                                | 8                                                     | 24                            | 80                                        | 1                              |
| A8            | 0.3                                                | 10                                                    | 24                            | 80                                        | 1                              |

**Table S2.** Langmuir adsorption isothermal parameters of Pb(II) on NaA molecular sieves at different temperatures

| <b>Heavy metal</b> | <b>Temperature (°C)</b> | <b>q<sub>max</sub> (mg/g)</b> | <b>K<sub>L</sub></b> | <b>R<sup>2</sup></b> |
|--------------------|-------------------------|-------------------------------|----------------------|----------------------|
| Cu                 | 25                      | 357.1428                      | 0.0223               | 0.9873               |
|                    | 35                      | 381.6793                      | 0.0239               | 0.9993               |
|                    | 45                      | 406.50406                     | 0.0241               | 0.9970               |
|                    | 55                      | 429.1845                      | 0.0270               | 0.9696               |
| Pb                 | 25                      | 606.0606                      | 0.8638               | 0.9935               |
|                    | 35                      | 628.9308                      | 1.1276               | 0.9972               |
|                    | 45                      | 645.1612                      | 1.2109               | 0.9974               |
|                    | 55                      | 666.6666                      | 1.3513               | 0.9978               |

**Table S3.** Freundlich adsorption isothermal parameters of Pb(II) on NaA molecular sieves at different temperatures

| <b>Heavy metal</b> | <b>Temperature (°C)</b> | <b>1/n</b> | <b>K<sub>F</sub></b> | <b>R<sup>2</sup></b> |
|--------------------|-------------------------|------------|----------------------|----------------------|
| Cu                 | 25                      | 0.5498     | 0.0212               | 0.9975               |
|                    | 35                      | 0.5607     | 0.0226               | 0.9795               |
|                    | 45                      | 0.5633     | 0.0240               | 0.9812               |
|                    | 55                      | 0.5722     | 0.0260               | 0.9263               |
| Pb                 | 25                      | 0.1364     | 0.3601               | 0.9921               |
|                    | 35                      | 0.13733    | 0.3810               | 0.9615               |
|                    | 45                      | 0.1387     | 0.3932               | 0.9429               |
|                    | 55                      | 0.1396     | 0.4087               | 0.9319               |

**Table S4.** Parameters of quasi-primary kinetic modelling of NaA molecular sieve adsorption at different metal ion concentrations

| <b>Heavy metal</b> | <b>Initial concentration (mg/L)</b> | <b>Q<sub>e, exp</sub> (mg/g)</b> | <b>Q<sub>e, cal</sub> (mg/g)</b> | <b>K<sub>1</sub></b> | <b>R<sup>2</sup></b> |
|--------------------|-------------------------------------|----------------------------------|----------------------------------|----------------------|----------------------|
| Pb                 | 25                                  | 250                              |                                  |                      |                      |
|                    | 50                                  | 450                              | 181.8196                         | 0.03591              | 0.9943               |
|                    | 75                                  | 540                              | 195.5079                         | 0.03999              | 0.9812               |
|                    | 100                                 | 600                              | 101.2548                         | 0.03262              | 0.8817               |
| Cu                 | 25                                  | 95                               | 35.2611                          | 0.0255               | 0.7882               |
|                    | 50                                  | 153                              | 42.3213                          | 0.0203               | 0.9063               |
|                    | 75                                  | 193                              | 42.4242                          | 0.0247               | 0.8180               |
|                    | 100                                 | 230                              | 36.8421                          | 0.0263               | 0.9707               |



**Table S5.** Parameters of quasi-secondary kinetic modelling of NaA molecular sieve adsorption at different heavy metal ion concentrations

| <b>Heavy metal</b> | <b>Initial concentration (mg/L)</b> | <b>Q<sub>e, exp</sub> (mg/g)</b> | <b>Q<sub>e, cal</sub> (mg/g)</b> | <b>K<sub>1</sub></b> | <b>R<sup>2</sup></b> |
|--------------------|-------------------------------------|----------------------------------|----------------------------------|----------------------|----------------------|
| Pb                 | 25                                  | 250                              |                                  |                      |                      |
|                    | 50                                  | 450                              | 467.2897                         | 0.00041              | 0.9995               |
|                    | 75                                  | 540                              | 555.5556                         | 0.00045              | 0.9998               |
|                    | 100                                 | 600                              | 609.7561                         | 0.00071              | 0.9999               |
| Cu                 | 25                                  | 95                               | 99.8004                          | 0.0012               | 0.9981               |
|                    | 50                                  | 153                              | 157.9778                         | 0.0014               | 0.9987               |
|                    | 75                                  | 193                              | 195.3125                         | 0.0015               | 0.9997               |
|                    | 100                                 | 230                              | 233.6449                         | 0.0017               | 0.9999               |

**Table S6.** Thermodynamic parameters of Cu and Pb adsorption on NaA molecular sieves

| Heavy metal | T (K) | $\Delta H$ (kJ/mol) | $\Delta S$ (J/mol·K) | $\Delta G$ (kJ/mol) |
|-------------|-------|---------------------|----------------------|---------------------|
| Cu          | 298   | 6.8846              | 32.1798              | -2.7112             |
|             | 308   |                     |                      | -3.0142             |
|             | 318   |                     |                      | -3.3495             |
|             | 328   |                     |                      | -3.6765             |
| Pb          | 298   | 6.2536              | 43.4836              | -6.7095             |
|             | 308   |                     |                      | -7.1390             |
|             | 318   |                     |                      | -7.5516             |
|             | 328   |                     |                      | -8.0274             |

**Table S7** Changes in heavy metal ion concentration before and after adsorption

|    | Heavy metal ion<br>concentration before<br>adsorption (mg/L) | Heavy metal ion<br>concentration after<br>adsorption(mg/L) |
|----|--------------------------------------------------------------|------------------------------------------------------------|
| Cu | 100                                                          | 77                                                         |
| Pb | 100                                                          | 40                                                         |

We observed a significant reduction in metal ion concentration after the adsorption process, as shown in Table S7. This reduction indicates the effective adsorption capability of NaA molecular sieves. Specific adsorption quantities can be calculated according to Eq. 1 in section 2.3 of the manuscript.

**Table S8** Comparison of the performance of NaA molecular sieve and other adsorbents

| Absorbent                                                    | Adsorbates       | Adsorption capacity | Reference |
|--------------------------------------------------------------|------------------|---------------------|-----------|
| CS-ZIF-8 composite beads                                     | Pb (II)          | 165.7 mg/g          | 1         |
|                                                              | Cu(II)           | 131.4mg/g           |           |
| DTC-AC                                                       | Pb (II)          | 203.36 mg/g         | 2         |
|                                                              | Cu(II)           | 53.13 mg/g          |           |
| 3DP of zeolite-Y                                             | Cu(II)           | 7.8 mg/g            | 3         |
|                                                              | Pb (II)          | 8.3 mg/g            |           |
| magnetic hollow MnFe <sub>2</sub> O <sub>4</sub> nanospheres | Pb <sup>2+</sup> | 291.07mg/g          | 4         |
| SBA-15 molecular sieves                                      | Pb <sup>2+</sup> | 131mg/g             | 5         |
| nano-zeolites                                                | Cu(II)           | 431 mg/g            | 6         |
|                                                              | Pb (II)          | 337.8mg/g           |           |
| NaA molecular sieve                                          | Cu(II)           | 230 mg/g            | This work |
|                                                              | Pb (II)          | 600 mg/g            |           |

**Table S9** Specific surface area and pore structure parameters of NaA molecular sieves before and after adsorption of heavy metal ions

| Samples             | $S_{\text{BET}}$ ( $\text{m}^2/\text{g}$ ) | $V_{\text{BJH}}$ ( $\text{cm}^3/\text{g}$ ) | $D_{\text{avg}}$ (nm) |
|---------------------|--------------------------------------------|---------------------------------------------|-----------------------|
| NaA molecular sieve | 36.9                                       | 0.20                                        | 21.9                  |
| NaA-Pb              | 21.8                                       | 0.15                                        | 25.4                  |
| NaA-Cu              | 31.7                                       | 0.17                                        | 26.8                  |

### References:

1. C. Wang, Q. Sun, L. Zhang, T. Su and Y. Yang, *Journal of Environmental Chemical Engineering*, 2022, **10**.
2. H.-Y. Niu, X. Li and J. Li, *New Journal of Chemistry*, 2022, **46**, 5234-5245.
3. A. Khalil, R. Hashaikeh and N. Hilal, *Journal of Water Process Engineering*, 2021, **42**.
4. C. Jin, G. Teng, Y. Gu, H. Cheng, S. Fu, C. Zhang and W. Ma, *New Journal of Chemistry*, 2019, **43**, 5879-5889.
5. V. Hernández-Morales, R. Nava, Y. J. Acosta-Silva, S. A. Macías-Sánchez, J. J. Pérez-Bueno and B. Pawelec, *Microporous and Mesoporous Materials*, 2012, **160**, 133-142.
6. H. Luo, W. W. Law, Y. Wu, W. Zhu and E.-H. Yang, *Microporous and Mesoporous Materials*, 2018, **272**, 8-15.
